# Supplementary material for: Transcriptional Responses of a Bicarbonate-Tolerant Monocot, Puccinellia tenuiflora, and a Related Bicarbonate-Sensitive Species, Poa annua, to NaHCO3 Stress
Source: MDPI journal article supplement (doi:10.3390/ijms16010496), 2014-12-29
Supplement: s1 [file s1]

# Supplementary Information

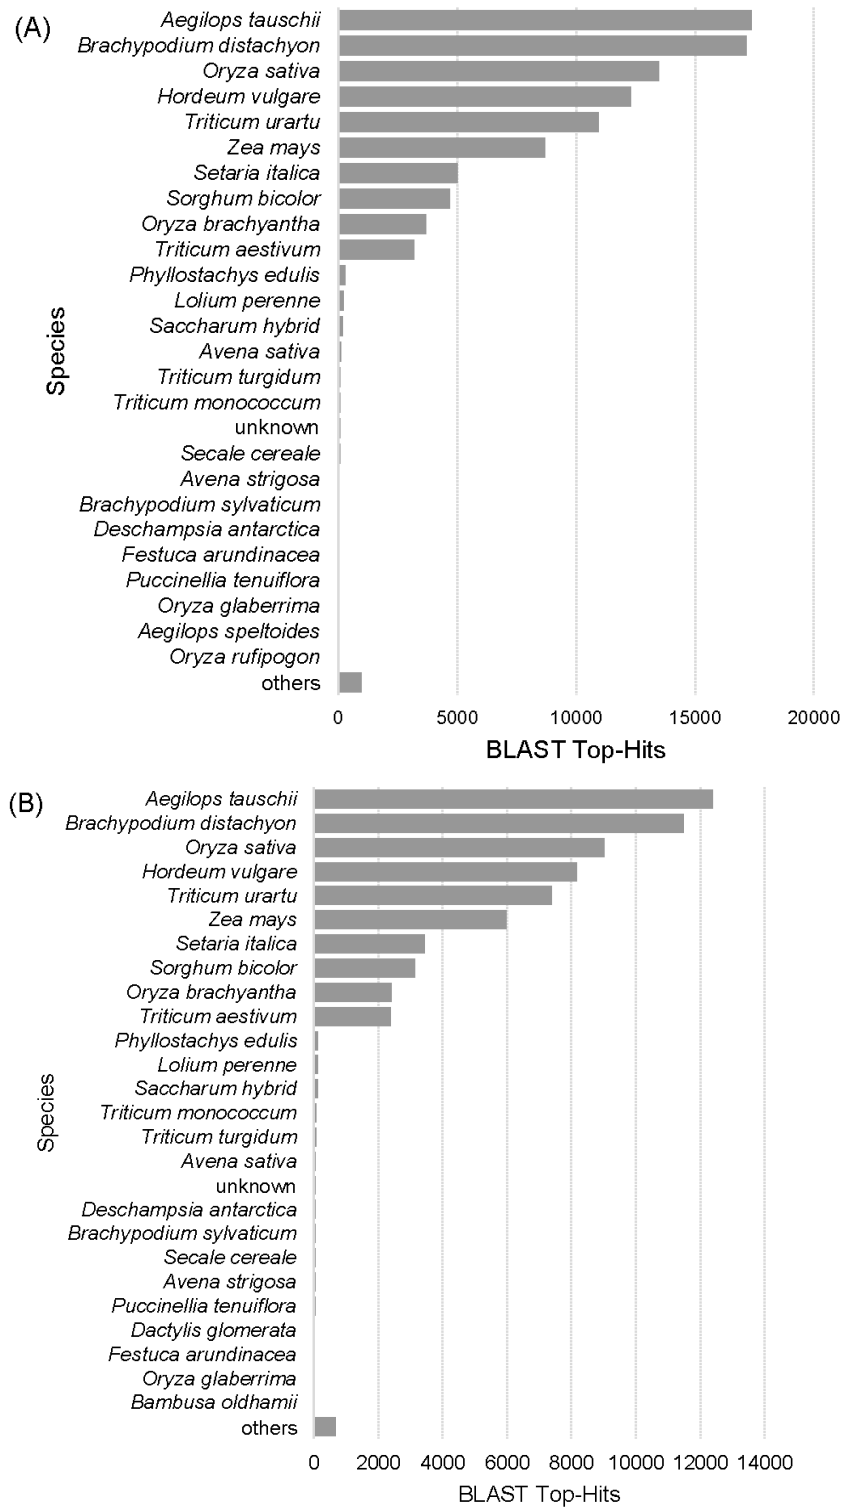

**Figure S1.** Species distribution of BLASTX Top-Hits for all the contigs of *P. annua* (A) and *P. tenuiflora* (B).

**Table S1.** The number of raw reads, reads after trimming, after rRNA removal and after duplicate removal. The number in the library name shows biological replicates. Trimming and duplicate removal were performed on CLC Genomics Workbench 7.5, and rRNA removal was performed using SortMeRNA (see Materials and Methods for details).

|         | Library Name                              | Raw Reads  | After Trimming | After rRNA Removal | After Duplicate Removal |
|---------|-------------------------------------------|------------|----------------|--------------------|-------------------------|
| Trial 1 | <i>P.annua</i> Control #1                 | 1,221,676  | 1,201,260      | 377,122            | 365,988                 |
|         | <i>P.annua</i> Control #2                 | 1,326,619  | 1,297,889      | 636,339            | 618,198                 |
|         | <i>P.annua</i> Control #3                 | 1,371,558  | 1,331,303      | 575,493            | 562,330                 |
|         | <i>P.annua</i> NaHCO <sub>3</sub> #1      | 6,309,444  | 5,485,722      | 3,014,428          | 2,804,851               |
|         | <i>P.annua</i> NaHCO <sub>3</sub> #2      | 4,485,250  | 4,061,710      | 1,891,144          | 1,798,961               |
|         | <i>P.annua</i> NaHCO <sub>3</sub> #3      | 12,398,809 | 11,594,592     | 5,869,987          | 5,405,662               |
|         | <i>P.tenuiflora</i> Control #1            | 1,577,650  | 1,530,988      | 585,050            | 564,038                 |
|         | <i>P.tenuiflora</i> Control #2            | 1,721,592  | 1,667,846      | 714,887            | 691,831                 |
|         | <i>P.tenuiflora</i> Control #3            | 1,291,296  | 1,261,253      | 538,138            | 524,223                 |
|         | <i>P.tenuiflora</i> NaHCO <sub>3</sub> #1 | 2,361,633  | 2,195,966      | 1,313,286          | 1,239,410               |
|         | <i>P.tenuiflora</i> NaHCO <sub>3</sub> #2 | 13,744,215 | 12,175,016     | 6,715,728          | 6,069,658               |
|         | <i>P.tenuiflora</i> NaHCO <sub>3</sub> #3 | 12,779,944 | 11,844,012     | 6,109,852          | 5,554,015               |
| Trial 2 | <i>P.annua</i> Control #1                 | 4,067,142  | 4,041,424      | 3,422,795          | 3,053,814               |
|         | <i>P.annua</i> Control #2                 | 2,756,049  | 2,736,724      | 2,218,280          | 1,836,941               |
|         | <i>P.annua</i> Control #3                 | 3,566,929  | 3,545,502      | 3,146,146          | 2,620,974               |
|         | <i>P.annua</i> NaHCO <sub>3</sub> #1      | 23,931,480 | 23,734,563     | 21,874,365         | 14,381,537              |
|         | <i>P.annua</i> NaHCO <sub>3</sub> #2      | 3,144,662  | 3,036,706      | 2,498,396          | 2,203,896               |
|         | <i>P.annua</i> NaHCO <sub>3</sub> #3      | 2,874,893  | 2,852,650      | 2,274,594          | 1,979,087               |
|         | <i>P.tenuiflora</i> Control #1            | 3,311,254  | 3,287,158      | 2,878,206          | 2,440,290               |
|         | <i>P.tenuiflora</i> Control #2            | 2,702,464  | 2,679,783      | 2,172,421          | 1,924,276               |
|         | <i>P.tenuiflora</i> Control #3            | 1,474,054  | 1,427,478      | 1,191,040          | 1,080,375               |
|         | <i>P.tenuiflora</i> NaHCO <sub>3</sub> #1 | 2,972,086  | 2,876,671      | 2,489,945          | 2,186,153               |
|         | <i>P.tenuiflora</i> NaHCO <sub>3</sub> #2 | 3,506,956  | 3,471,033      | 2,881,652          | 2,593,260               |
|         | <i>P.tenuiflora</i> NaHCO <sub>3</sub> #3 | 2,360,628  | 2,339,598      | 2,029,696          | 1,765,696               |

**Table S3.** Primers used for qRT-PCR analysis.

| <b>Primer Name</b> | <b>Sequence</b>       |
|--------------------|-----------------------|
| Put_1383 FW        | CGTCGCCTTCATAGACATCA  |
| Put_1383 RV        | GGCACGATGAAGGTGGTACT  |
| Put_4625 FW        | GGGGATGATTTGTTACACACC |
| Put_4625 RV        | CATCTGCAGGGTACCAATCC  |
| Put_1357 FW        | GTGGCCGTGGTGATACTCTT  |
| Put_1357 RV        | GAAAATGAACTGCGTCAGCA  |
| Put_22802 FW       | TCCAAATTATGAGGCACGCG  |
| Put_22802 RV       | TTGCAGCTGTGTTCTTGTCC  |
| Put_2050 FW        | TTGGCTGGAGAATTTGATCC  |
| Put_2050 RV        | CCAGAGAACCGAAGTGGGTA  |
| Put_1973 FW        | CGTCATGCACTACCTCATGC  |
| Put_1973 RV        | AGCCTGTTGTGATCAGTCGA  |
| Put_11515 FW       | TCGATGTGAATGATGCAGCG  |
| Put_11515 RV       | GCAGGCGTGAGAAAATGGTA  |
